# Supplementary material for: Quantitative Electroencephalography Analysis for Improved Assessment of Consciousness Levels in Deep Coma Patients Using a Proposed Stimulus Stage
Source: MDPI journal article supplement (doi:10.3390/diagnostics13081383), 2023-04-10
Supplement: s1 [file s1]

# Supplementary Material: Quantitative Electroencephalography Analysis for Improved Assessment of Different Consciousness Level in Comatose Patients Using a Proposed Stimulus Stage

Çiğdem Gülüzar Altıntop, Fatma Latifoğlu, Aynur Karayol Akin, and Ayşe Ülgey

**Table S1.** Kruskal Wallis test post-hoc results (Dunn's test, Bonferroni correction).

| Feature/<br>EEG Band  | Channel 1 (F3-F4) |      |       |       | Channel 2 (C3-C4) |      |       |       | Channel 3 (T3-T4) |      |       |       | Channel 4 (P3-P4) |      |       |       |
|-----------------------|-------------------|------|-------|-------|-------------------|------|-------|-------|-------------------|------|-------|-------|-------------------|------|-------|-------|
|                       | alpha             | beta | theta | delta |
| 1st Feature<br>Energy |                   |      |       |       | 3-4               |      | 3-4   | 3-4   |                   | 3-4  |       | 3-5   |                   |      | 3-4   |       |
|                       | 3-4               | 3-4  | 3-4   | 3-4   | 3-5               | 3-4  | 3-5   | 3-5   | 3-5               | 3-5  | 3-5   | 3-6   | 3-4               | 3-4  | 3-5   | 3-4   |
|                       | 3-5               | 3-5  | 3-5   | 3-5   | 3-6               | 3-5  | 3-6   | 3-6   | 3-6               | 3-6  | 3-6   | 3-7   | 3-6               | 3-5  | 3-6   | 3-6   |
|                       | 3-6               | 3-6  | 3-6   | 3-6   | 3-7               | 3-6  | 3-7   | 3-7   | 3-7               | 3-7  | 3-7   | 4-5   | 3-6               | 3-6  | 3-7   | 3-7   |
|                       | 3-7               | 3-7  | 3-7   | 3-6   | 4-8               | 3-7  | 4-8   | 4-8   | 5-8               | 4-6  | 4-6   | 4-6   | 3-7               | 3-7  | 4-8   | 5-7   |
| 2nd Feature<br>fmax   | 3-8               | 3-8  | 3-8   | 3-7   | 5-8               | 3-8  | 5-8   | 5-8   | 6-8               | 6-7  | 5-8   | 5-8   | 4-8               | 5-8  | 6-8   | 7-8   |
|                       |                   |      |       |       | 7-8               |      | 6-8   | 6-8   |                   | 6-8  | 6-8   | 6-7   |                   |      | 7-8   |       |
|                       |                   |      |       |       |                   |      | 7-8   | 7-8   |                   |      |       | 6-8   |                   |      |       |       |
|                       |                   |      |       |       |                   |      |       |       |                   |      |       |       |                   |      |       |       |
|                       |                   |      |       |       |                   |      |       |       |                   |      |       |       |                   |      |       |       |
| 3rd Feature<br>Pmax   |                   | 3-6  |       |       |                   | 3-8  |       |       |                   |      |       |       | 3-5               |      |       |       |
|                       | 3-4               | 3-8  |       |       |                   | 4-8  |       |       |                   | 3-8  |       |       | 3-7               | 3-6  | 3-4   |       |
|                       | 3-5               | 4-8  | 3-6   | **    | **                | 5-8  | **    | **    | 3-5               | 4-8  | 3-6   | 3-6   | 4-5               | 4-8  | 4-6   | **    |
|                       | 3-6               | 5-8  | 6-7   |       |                   | 6-8  |       |       | 4-5               | 5-8  | 4-6   | 3-7   | 5-8               | 5-8  | 4-7   |       |
|                       | 3-7               | 6-8  |       |       |                   | 7-8  |       |       |                   | 6-8  |       |       | 6-7               | 6-8  | 5-7   |       |
| 4th Feature<br>Area1  |                   | 7-8  |       |       |                   |      |       |       |                   | 7-8  |       |       | 6-5               | 7-8  |       |       |
|                       |                   |      |       |       |                   |      |       |       |                   |      |       |       | 7-8               |      |       |       |
|                       |                   |      |       |       |                   |      |       |       |                   |      |       |       |                   |      |       |       |
|                       |                   |      |       |       |                   |      |       |       |                   |      |       |       |                   |      |       |       |
|                       |                   |      |       |       |                   |      |       |       |                   |      |       |       |                   |      |       |       |
| 5th Feature<br>Area2  | 3-4               | 3-4  | 3-4   | 3-4   | 3-4               | 3-4  | 3-4   | 3-4   | 3-5               | 3-5  | 3-5   | 3-5   | 3-4               | 3-4  | 3-4   | 3-6   |
|                       | 3-5               | 3-5  | 3-4   | 3-5   | 3-5               | 3-5  | 3-6   | 3-6   | 3-7               | 3-6  | 3-7   | 3-7   | 3-5               | 3-7  | 3-5   | 3-7   |
|                       | 3-6               | 3-6  | 3-5   | 3-6   | 3-6               | 3-6  | 3-7   | 3-7   | 4-6               | 3-7  | 4-6   | 4-5   | 3-6               | 3-8  | 3-7   | 4-7   |
|                       | 3-7               | 3-7  | 3-6   | 3-7   | 3-7               | 3-7  | 4-8   | 4-8   | 4-8               | 4-6  | 5-8   | 4-6   | 3-7               | 5-8  | 4-8   | 5-7   |
|                       | 3-8               | 3-8  | 3-7   | 6-8   | 5-8               | 3-8  | 5-8   | 5-8   | 5-8               | 4-6  | 5-8   | 5-8   | 4-8               | 6-8  | 6-8   | 6-7   |
| 6th Feature<br>Ratio1 |                   |      |       |       | 7-8               |      | 6-8   | 6-8   | 6-8               | 7-6  | 6-8   | 6-7   | 4-8               | 7-8  | 7-8   | 7-8   |
|                       |                   |      |       |       |                   |      | 7-8   | 7-8   | 7-8               |      |       | 6-8   |                   |      |       |       |
|                       |                   |      |       |       |                   |      |       |       |                   |      |       |       |                   |      |       |       |
|                       |                   |      |       |       |                   |      |       |       |                   |      |       |       |                   |      |       |       |
|                       |                   |      |       |       |                   |      |       |       |                   |      |       |       |                   |      |       |       |
| 7th Feature           |                   |      |       |       | 3-4               |      | 3-4   | 3-4   |                   |      |       | 3-5   |                   |      | 3-4   | 3-4   |
|                       |                   |      |       |       | 3-5               |      | 3-5   | 3-5   | 3-5               |      |       | 3-6   |                   | 3-4  | 3-6   | 3-5   |
|                       |                   |      |       |       | 3-6               | 3-4  | 3-6   | 3-6   | 3-6               | 3-5  | 3-6   | 3-7   | 3-4               | 3-5  | 3-7   | 3-6   |
|                       |                   |      |       |       | 3-7               | 3-5  | 3-7   | 3-7   | 3-7               | 3-6  | 3-7   | 4-5   | 3-5               | 3-6  | 5-7   | 3-7   |
|                       |                   |      |       |       | 4-8               | 3-6  | 4-8   | 4-8   | 4-6               | 3-7  | 4-6   | 4-6   | 3-6               | 3-7  | 4-8   | 5-7   |

|                        |                                 |                                        |                                 |                          |                                               |                                                      |                                                      |                                                      |                                                      |                                                      |                                                      |                                                      |                                               |                                               |                                               |                          |
|------------------------|---------------------------------|----------------------------------------|---------------------------------|--------------------------|-----------------------------------------------|------------------------------------------------------|------------------------------------------------------|------------------------------------------------------|------------------------------------------------------|------------------------------------------------------|------------------------------------------------------|------------------------------------------------------|-----------------------------------------------|-----------------------------------------------|-----------------------------------------------|--------------------------|
| Ratio2                 | 6-8                             | 3-8<br>4-8<br>5-8<br>6-8<br>7-8        | 5-7<br>6-7<br>8-7               |                          | 5-6                                           | 3-8<br>4-8<br>5-8<br>6-8<br>7-8                      |                                                      |                                                      | 3-8<br>5-6<br>5-7<br>6-8<br>7-8                      | 4-8<br>5-8<br>6-8<br>7-8                             |                                                      |                                                      |                                               | 3-6<br>3-8<br>4-8<br>5-8<br>6-8<br>7-8        | 3-5<br>4-6<br>5-6                             |                          |
| 8th Feature<br>Ratio3  | 4-8<br>6-8                      | 3-6<br>3-8<br>4-8<br>5-8<br>6-8<br>7-8 | 3-7<br>5-7<br>6-7<br>8-7        | **                       | 3-6<br>5-6                                    | 3-4<br>3-8<br>4-8<br>5-8<br>6-8<br>7-8               | 3-8                                                  | **                                                   | 3-5<br>3-8<br>5-6<br>5-7<br>6-8<br>7-8               | 3-8<br>4-8<br>5-8<br>6-8<br>7-8                      | **                                                   | 4-5                                                  | 5-6                                           | 3-4<br>3-6<br>3-8<br>4-8<br>5-8<br>6-8<br>7-8 | 3-4<br>3-5<br>4-6<br>5-6                      | **                       |
| 9th Feature<br>NTPower | 3-4<br>3-5<br>3-6<br>3-7        | 3-8<br>4-8<br>5-8<br>6-8<br>7-8        | 3-4<br>3-5<br>3-6<br>3-7<br>4-8 | 3-4<br>3-5<br>3-6<br>3-7 | 3-4<br>3-5<br>3-6<br>3-7<br>4-8<br>5-8<br>7-8 | 3-4<br>3-5<br>3-8<br>3-7<br>5-6<br>5-7<br>6-8<br>7-8 | 3-4<br>3-5<br>3-6<br>3-7<br>4-8<br>5-8<br>6-8<br>7-8 | 3-4<br>3-5<br>3-6<br>3-7<br>4-8<br>5-8<br>6-8<br>7-8 | 3-4<br>3-5<br>3-6<br>3-7<br>4-8<br>5-8<br>6-8<br>7-8 | 3-4<br>3-5<br>3-6<br>3-7<br>4-8<br>5-8<br>6-8<br>7-8 | 3-5<br>3-6<br>3-7<br>4-6<br>5-8<br>6-8               | 3-5<br>3-6<br>3-7<br>4-6<br>5-8<br>6-7<br>6-8<br>7-8 | 3-4<br>3-6<br>3-7<br>4-5<br>4-8               | 3-4<br>3-6<br>3-7<br>4-5<br>4-8<br>6-8<br>7-8 | 3-4<br>3-6<br>3-7<br>4-5<br>4-8<br>6-8<br>7-8 | 3-6<br>3-7<br>5-7<br>7-8 |
| 10th Feature<br>TPower | 3-4<br>3-5<br>3-6<br>3-7<br>3-8 | 3-4<br>3-5<br>3-6<br>3-7<br>3-8        | 3-4<br>3-5<br>3-6<br>3-7        | 3-4<br>3-5<br>3-6<br>3-7 | 3-4<br>3-5<br>3-6<br>3-7<br>4-8<br>5-8<br>7-8 | 3-4<br>3-5<br>3-6<br>3-7<br>4-8<br>5-8<br>6-8<br>7-8 | 3-4<br>3-5<br>3-6<br>3-7<br>4-8<br>5-8<br>6-8<br>7-8 | 3-4<br>3-5<br>3-6<br>3-7<br>4-8<br>5-8<br>6-8<br>7-8 | 3-5<br>3-6<br>3-7<br>4-6<br>5-8<br>6-8<br>7-8        | 3-5<br>3-6<br>3-7<br>4-6<br>5-8<br>6-8<br>7-8        | 3-5<br>3-6<br>3-7<br>4-5<br>4-6<br>5-8<br>6-7<br>6-8 | 3-5<br>3-6<br>3-7<br>4-5<br>4-6<br>5-8<br>6-7<br>6-8 | 3-4<br>3-5<br>3-6<br>3-7<br>4-8<br>5-8<br>7-8 | 3-4<br>3-6<br>3-7<br>3-8<br>5-8               | 3-4<br>3-5<br>3-6<br>3-7<br>4-8<br>6-8<br>7-8 | 3-6<br>3-7<br>5-7<br>7-8 |

\*\* significance value  $p > 0.05$ . (3-4 shows that features obtained from EEG signals of GCS 3 and GCS 4 patients are statistically different).
